# Supplementary material for: Investigating antibody neutralization of lyssaviruses using lentiviral pseudotypes: a cross-species comparison
Source: PubMed Central journal article supplement (PMC2886951; doi:10.1099/vir.0.2008/000349-0), 2008-09
Supplement: supp_89_9_2204__1.pdf [file supp_89_9_2204__1.pdf]

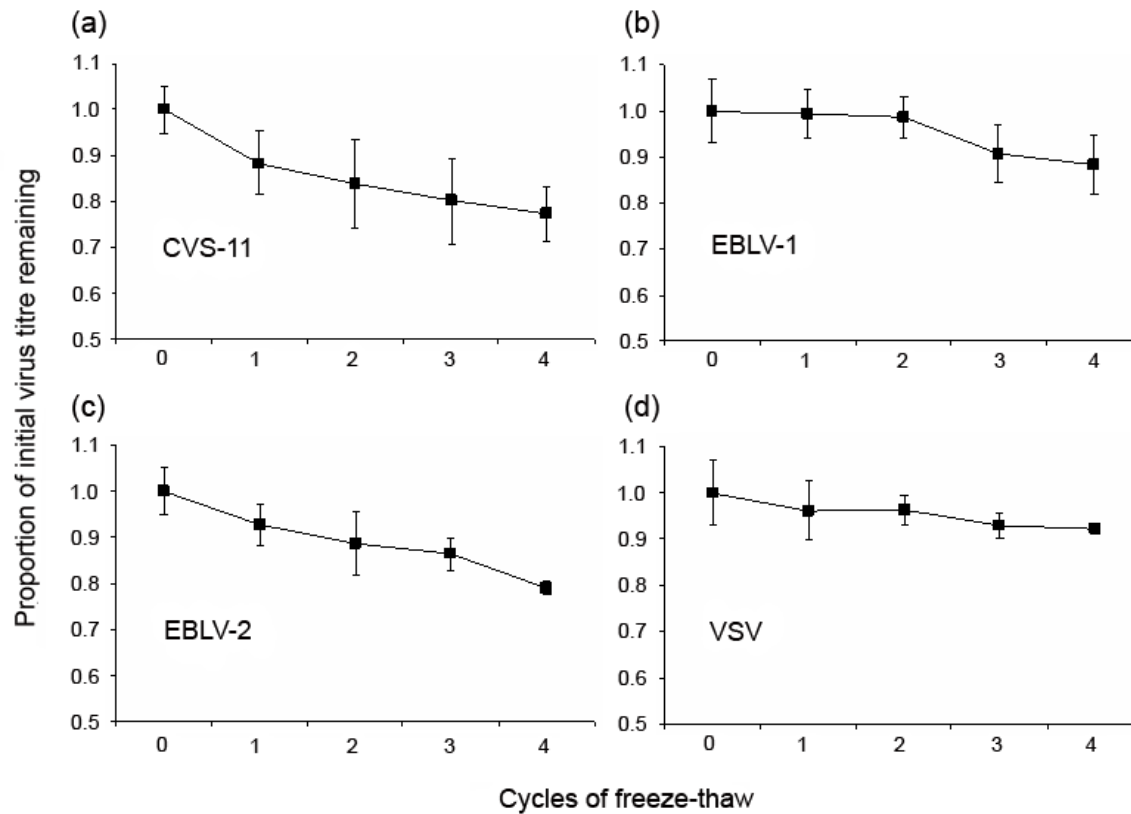

**Fig. S1.** Stability of lyssavirus pseudotypes. Lentiviral pseudotypes packaging the luciferase reporter and expressing (a) CVS-11, (b) EBLV-1, (c) EBLV-2 and (d) VSV G-proteins were subjected to four cycles of freeze–thaw. A 5  $\mu$ l aliquot of each sample was then incubated with  $1 \times 10^4$  BHK cells for 48 h, after which the level of viral infection was determined; this is reported as the proportion of virus remaining compared to the sample that underwent no (0) freeze–thaw cycles. The mean  $\pm$ SD of four experiments is shown.

**Table S1.** Primers used to amplify G-protein sequences

| Name    | Sequence (5'–3')                       |
|---------|----------------------------------------|
| CVS-11F | GCGCGCGGTACCGCCACCATGGTTCCTCAGGTTCTT   |
| CVS-11R | GCGCGCCTCGAGTTACAGTCTGATCTCACCTC       |
| EBLV-1F | GCGCGCGGTACCGCCACCATGTTACTCTCTACCGCCAT |
| EBLV-1R | GCGCGCCTCGAGTTATGACTCACCAGTGGC         |
| EBLV-2F | GCGCGCGGTACCGCCACCATGCCATTCCAAGCTGTT   |
| EBLV-2R | GCGCGCCTCGAGTTAAGACTGACCCCCGTCT        |

---

**Wright, E., Temperton, N. J., Marston, D. A., McElhinney, L. M., Fooks, A. R. & Weiss, R. A. (2008).** Investigating antibody neutralization of lyssaviruses using lentiviral pseudotypes: a cross-species comparison. *J Gen Vir* **89**, 2204–2213.

**Table S2.** Comprehensive details of sera used in this study. The OIE standard reference dog serum and a commercially available negative control sera (Harlan Sera-Lab) were also used.

| Serum ID  | Species | Breed                      | Age*    | Sex    | Date of vaccination† | Date bled† | Vaccine | FAVN titre (IU ml <sup>-1</sup> ) |
|-----------|---------|----------------------------|---------|--------|----------------------|------------|---------|-----------------------------------|
| PET-5825  | Canine  | Cross-breed                | 5 yrs   | Female | 18.04.07             | 13.06.07   | Nobivac | 0.87                              |
| PET-1333  | Canine  | Border Collie              | 3 yrs   | Male   | 18.01.07             | 08.02.07   | Nobivac | 1.5                               |
| PET-1326  | Canine  | Staffordshire Bull Terrier | 4 mths  | Female | 04.01.07             | 05.02.07   | Nobivac | 4.5                               |
| PET-1329  | Canine  | Boxer                      | 4 yrs   | Female | 08.01.07             | 08.02.07   | Nobivac | 10.26                             |
| RS 175/07 | Human   | ‡                          | 38 yrs  | Male   | ‡                    | 15.08.07   | ‡       | 23.38                             |
| RC 199/07 | Canine  | Pug                        | 3 yrs   | Female | ‡                    | 25.07.07   | ‡       | 23.38                             |
| PET-1335  | Feline  | DSH§                       | 1 yr    | Female | 18.10.07             | 01.02.07   | Virbac  | 23.38                             |
| RC 248/07 | Feline  | DSH§                       | 3 yrs   | Female | 18.07.07             | 17.08.07   | Virbac  | 30.77                             |
| RC200/07  | Canine  | Mixed                      | 1 yr    | Female | ‡                    | 25.06.07   | ‡       | 30.77                             |
| 2857/06   | Human   | ‡                          | 28 yrs  | Male   | ‡                    | 15/09/2007 | ‡       | 53.0                              |
| RS 174/07 | Human   | ‡                          | 20 yrs  | Male   | ‡                    | 15.08.07   | ‡       | 121.5                             |
| RC 215/07 | Canine  | Cross-breed                | 5 yrs   | Female | 08.05.07             | 30.06.07   | Eurican | 210.44                            |
| RC 195/07 | Feline  | DSH§                       | 2 yrs   | Female | 26.12.06             | 20.06.07   | Nobivac | 364.5                             |
| PET-1310  | Feline  | DSH§                       | 16 yrs  | Female | 27.01.07             | 07.02.07   | Nobivac | 631.33                            |
| 5517      | Canine  | Mongrel                    | 5 yrs   | Male   | 27.04.07             | 08.06.07   | Nobivac | 0.29                              |
| 5531      | Canine  | Labrador                   | 1 yr    | Female | 14.05.07             | 13.06.07   | Nobivac | 0.38                              |
| 5545      | Canine  | Rhodesian Ridgeback        | 6.5 yrs | Male   | 14.05.07             | 14.06.07   | Rabisin | 0.22                              |
| 5546      | Feline  | ‡                          | 8 yrs   | Male   | 23.05.07             | 13.06.07   | Nobivac | 0.38                              |

**Wright, E., Temperton, N. J., Marston, D. A., McElhinney, L. M., Fooks, A. R. & Weiss, R. A. (2008).** Investigating antibody neutralization of lyssaviruses using lentiviral pseudotypes: a cross-species comparison. *J Gen Vir* **89**, 2204–2213.

|      |        |                            |         |        |          |          |            |      |
|------|--------|----------------------------|---------|--------|----------|----------|------------|------|
| 5610 | Feline | DSH§                       | 11 yrs  | Male   | 17.05.07 | 18.06.07 | Rabisin    | 0.38 |
| 5637 | Canine | Newfoundland               | 4 mths  | Male   | 17.05.07 | 18.06.07 | Rabisin    | 0.13 |
| 5710 | Canine | Staffordshire Bull Terrier | 4 mths  | Female | 21.05.07 | 20.06.07 | Nobivac    | 0.06 |
| 5734 | Canine | Border Collie              | 8 years | Male   | 01.06.07 | 22.06.07 | Rabisin    | 0.38 |
| 5775 | Canine | Rottweiler                 | 15 wks  | Male   | 31.05.07 | 21.06.07 | Nobivac    | 0.29 |
| 5791 | Canine | Cross-breed                | 3 yrs   | Male   | 08.05.07 | 13.06.07 | Virbagen   | 0.06 |
| 5858 | Canine | Bedlington Terrier         | 9.5 yrs | Male   | 16.11.06 | 26.06.07 | Rabisin    | 0.1  |
| 5890 | Canine | Flat Coat Retriever        | 5 yrs   | Male   | 11.05.07 | 27.06.07 | Nobivac    | 0.06 |
| 5894 | Canine | German Shepard             | 9 yrs   | Female | 11.06.07 | 25.06.07 | Quantum    | 0.04 |
| 5896 | Canine | Jack Russell Terrier       | 11 yrs  | Male   | 11.06.07 | 25.06.07 | Quantum    | 0.07 |
| 5910 | Canine | Cross-breed                | 18 mths | Male   | 18.05.07 | 28.06.07 | Quantum    | 0.1  |
| 5927 | Feline | DSH§                       | 12 yrs  | Male   | 25.05.07 | 27.06.07 | Nobivac    | 0.1  |
| 5930 | Canine | King Charles Spaniel       | 4 mths  | Male   | 06.06.07 | 27.06.07 | Nobivac    | 0.29 |
| 5950 | Canine | Bernese Mountain Dog       | 7 yrs   | Male   | 31.05.07 | 27.06.07 | Nobivac    | 0.22 |
| 5977 | Canine | Golden Retriever           | 1 yr    | Male   | 26.02.07 | 24.06.07 | Fort Dodge | 0.22 |
| 6041 | Canine | German Shepherd            | 3 yrs   | Female | 06.06.07 | 03.07.07 | Nobivac    | 0.29 |
| 6048 | Canine | Cross-breed                | 2 yrs   | Male   | 18.06.07 | 02.07.07 | Rabisin    | 0.1  |
| 6108 | Canine | Labrador Retriever         | 5 yrs   | Female | 29.05.07 | 29.06.07 | Nobivac    | 0.38 |
| 6115 | Canine | Retriever                  | 8 yrs   | Female | 11.06.07 | 02.07.07 | Rabisin    | 0.04 |
| 6126 | Canine | Boxer                      | 3 mths  | Female | 12.06.07 | 03.07.07 | Nobivac    | 0.38 |
| 6144 | Canine | Border Collie              | 9 yrs   | Male   | 08.06.07 | 04.07.07 | Rabisin    | 0.04 |
| 6146 | Canine | Labrador Retriever         | 6 yrs   | Male   | 25.05.07 | 04.07.07 | Nobivac    | 0.29 |
| 6183 | Feline | DSH§                       | 15 yrs  | Female | 04.06.07 | 05.07.07 | Nobivac    | 0.04 |

**Wright, E., Temperton, N. J., Marston, D. A., McElhinney, L. M., Fooks, A. R. & Weiss, R. A. (2008).** Investigating antibody neutralization of lyssaviruses using lentiviral pseudotypes: a cross-species comparison. *J Gen Vir* **89**, 2204–2213.

|      |        |                    |         |        |          |          |            |      |
|------|--------|--------------------|---------|--------|----------|----------|------------|------|
| 6203 | Canine | Golden Retriever   | 10 mths | Male   | 14.05.07 | 06.07.07 | Nobivac    | 0.38 |
| 6216 | Canine | Labrador Retriever | 8 yrs   | Female | 05.06.07 | 04.07.07 | Quantum    | 0.29 |
| 6266 | Canine | Dachshund          | 11 yrs  | Male   | 05.06.07 | 09.07.07 | Canigen    | 0.38 |
| 6271 | Canine | Golden Retriever   | 1 yr    | Male   | 07.07.07 | 07.07.07 | Nobivac    | 0.17 |
| 6325 | Feline | ‡                  | 8 mths  | Male   | 27.02.07 | 08.07.07 | Nobivac    | 0.38 |
| 6360 | Canine | Scottish Terrier   | 6 yrs   | Male   | 01.06.07 | 10.07.07 | Nobivac    | 0.1  |
| 6369 | Canine | West H.W. Terrier  | 10 yrs  | Female | 18.01.07 | 10.07.07 | Nobivac    | 0.06 |
| 6374 | Canine | Cross-breed        | 5 yrs   | Male   | 20.06.07 | 11.06.07 | Nobivac    | 0.38 |
| 6386 | Canine | Boxer              | 6 mths  | Female | 16.04.07 | 01.07.07 | Fort Dodge | 0.17 |
| 6389 | Canine | Labrador Retriever | 6.5 yrs | Male   | 21.03.07 | 02.07.07 | Nobivac    | 0.07 |
| 6460 | Canine | Golden Retriever   | 8 yrs   | Female | 11.06.07 | 16.07.07 | Rabisin    | 0.07 |
| 6507 | Canine | Scottish Terrier   | 8 yrs   | Female | 08.06.07 | 17.07.07 | Nobivac    | 0.17 |
| 6533 | Canine | French Bulldog     | 5 mths  | Male   | 22.05.07 | 17.07.07 | Canigen    | 0.38 |
| 6579 | Canine | Boxer              | 8 yrs   | Male   | 04.06.07 | 19.07.07 | Rabisin    | 0.29 |
| 6602 | Canine | Springer Spaniel   | 2 yrs   | Female | 18.04.07 | 19.07.07 | Rabisin    | 0.22 |
| 6604 | Canine | German Shepherd    | 2 yrs   | Female | 18.01.07 | 12.07.07 | Nobivac    | 0.22 |
| 6698 | Canine | Cross-breed        | 12 yrs  | Male   | 13.06.07 | 16.07.07 | Rabisin    | 0.29 |

\*. Age is given in weeks (wks), months (mths) or years (yrs).

†, Dates are given as DD.MM.YY.

‡, Data unavailable.

§, Feline breed DSH is domestic short hair.

---

**Wright, E., Temperton, N. J., Marston, D. A., McElhinney, L. M., Fooks, A. R. & Weiss, R. A. (2008).** Investigating antibody neutralization of lyssaviruses using lentiviral pseudotypes: a cross-species comparison. *J Gen Vir* **89**, 2204–2213.
